# Supplementary material for: Starch Branching Enzyme 1 Is Important for Amylopectin Synthesis and Cyst Reactivation in Toxoplasma gondii
Source: PubMed Central journal article supplement (PMC9241709; doi:10.1128/spectrum.01891-21), 2022-04-21
Supplement: spectrum.01891-21-s001.pdf [file spectrum.01891-21-s001.pdf]

*Neospora caninum* SBE1  
*Toxoplasma gondii* SBE1  
*Besnoitia besnoiti* SBE1  
*Eimeria tenella* SBE1  
*Vitrella brassicaformis* GlgB  
*Cryptosporidium parvum* SBE1  
*Gregarina niphandrodes* SBE1  
*Paludisphaera borealis* GlgB  
*Aquisphaera giovannonii* GlgB  
*Isoosphaera pallida* GlgB  
*Thiohalomonas denitrificans* GlgB  
*Solemya velesiana* GlgB  
*Nitrosomonas communis* GlgB  
*Candidatus Thiomargarita*  
*Homo sapiens* GBEL  
*Mus musculus* GBEL  
*Arabidopsis thaliana* SBE2

-----EGTAAAEETAAASSKGDTEQAKVYVPLLEHLPQSTLSEHDVHLLHKAHGGDPFVGLGCHEVKGQKQEK-IVVVRWIRNAKSIIRLR-ASGRSECVLIT-EEFVPMKEK---ADFLFQKAF 117  
 -----KGSDEVREAGAPAKGEGRRVYVYVPLKDLPGSSLSEHDVHLLHKAHGGDPFVGLGCHEVKGQKQEK-ILIVRAWIRNAKTIIRLR-ALECECVVLA-EEFVPMKEK---ADFLFQKAF 117  
 -----RKENGDCGGTAVKREGTGDPPAVNFVLPDLSLPAGASLSDYVHLLHKAHGGDPFVGLGCHEVKGQKQEK-ILIVRAWIRNAQSLQLR-ASGRSECVLA-AAITVGMKEK---AEFLFQRAF 120  
 -----KEQPYTNMNDVAKVDHVEEAQRHDQTHFMAVPIVLPNADIPYDMHLLNLAHADPPRMLGCHKVECADSKRIVVVRVWLNKVDHVELRPRAGVSDWRLPPPLESGLERK---GELLPHKAS 123  
 -----HEAEGSNELDAAPVTYEPFVPGEP--SYFVETLDSVPGGAHISDHDHLLHKAHGGDPFVGLGCHPVDHGDGAK-YFLVRAWIKDARDARLR-CVPGSAVQLVNDNEPVWLHKK---GEWMPQMFV 119  
 -----TAANSPTSYSSSMASIPDERGDIYEALDRVPDDGKLLDHLHLLNKAHPEPFVGLVQKFG-DDGQYEVYVVRWVRNARRIQK-AIDYFSSIGTNNTPVEMEQRIIDGNPSWMPKCAF 120  
 -----LHSAHADPFAVLGPHAYGGQDRAVVIRAWIKDAAEVELR-FTGSLATVPQDLTEAPASESEADHLQGERLQONHOGGHEPDQAESPASCRLOASGGVWPKLHRR---ADWLFGCAF 120  
 -----MALMTRQQSIVSQADLDLITHASHWNPFITLGPSPSTKEGS-KGWTIRAFLEARRASV--DLRGEPEGK---LYPMEKTH---ADGFFBAS 86  
 -----MFLVNVNADHWNPFVVLGPHMEGQNGRKSQVIRAFLEARRASLV--DLAGEPEGK---LYPMEKTH---ADGFFBAS 72  
 -----SDFVASSTSSVSPSPSPSLRVDSQAASGSGSSRPSWIAEADVQRLIHADDDPFAVLGPHAEHLGVP--GWVVRAFLEPTAREATV--LITSPAPYQGGPFFMTKRVH---PDGVVEVAF 119  
 -----MISLISLNEAHVKNLSEGEQKILEARHDDPFEVLGRHPDGD--GIVIRAFLEPTAREAAIE--SRDRP---LPMDRIP---NTDLFEWRG 79  
 -----MDSKLEELPKRLADARHDDPFEVLGRHVDG--HAMIRAVLPQAQQARTV--GNP---LPLERIP---GTDFFPEWG 68  
 -----MP-LNNDIAKIIAARHDDPFTVLGRHKEG--MIVRAFPHAKSVTIA--ENG---LTMORVG---GTDLFEWQG 65  
 -----MKIPKLDLQKIVDACHDDPFSVLGKHTVRC--QLVVRVYIPYAEQVTTA--EGN---LSMRRIE---GTDLFEWQG 68  
 -----MAAPMTPAAR-----PEDYEAALNAALADVPELA----- 29  
 -----MAAPAAPAAG-----ETGPEARLEAALADVPELA----- 29  
 MVTYISGVRFPPLPSIKKKNSLHFNEDLRRSNAVSLRKRDSRSGKVFARKPSYSDSSSLATLASEKLRHQSDSSSSASDQVQSRDTSVDDTQVLGNVDVQKLEEAQETEILDQISALSTGSGISYKEDFAK---MSHVDQEV 146  
 1.....10.....20.....30.....40.....50.....60.....70.....80.....90.....100.....110.....120.....130.....140.....150

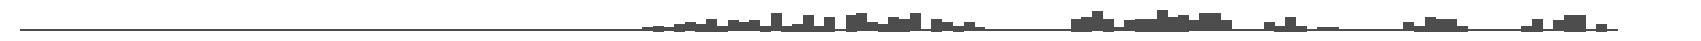

*Neospora caninum* SBE1  
*Toxoplasma gondii* SBE1  
*Besnoitia besnoiti* SBE1  
*Eimeria tenella* SBE1  
*Vitrella brassicaformis* GlgB  
*Cryptosporidium parvum* SBE1  
*Gregarina niphandrodes* SBE1  
*Paludisphaera borealis* GlgB  
*Aquisphaera giovannonii* GlgB  
*Isoosphaera pallida* GlgB  
*Thiohalomonas denitrificans* GlgB  
*Solemya velesiana* GlgB  
*Nitrosomonas communis* GlgB  
*Candidatus Thiomargarita*  
*Homo sapiens* GBEL  
*Mus musculus* GBEL  
*Arabidopsis thaliana* SBE2

AVHR-----VAS-EETASSP-----KRTEPVKPEALRE 146  
 VVHR-----LASEKETASSP-----CKATQSKPGEILESD 147  
 TVHR-----IAGDASAVNSTD-----ARLETAEPGEAVASD 151  
 ANAR-----AASAFEMVTTD-----PSASSRGCVPKSS 151  
 KVVR-----AAEGKPLPTKD-----S 135  
 KTLKEKIPHCRTHFCGYDENLENSNIENKRIQNSNKKDDYSTDKFSDVGSSEANNKVNKNTIVSKKKEITADCNISIVEKTYSNVIVNTLNKSKTNLVPNKESHKGNEMPKLELNQSNLMSNIIPRNKNIRESACSSDEACNICYVHDNINIQ 270  
 NNLPL-----ITIEAAEATD-----L 135  
 PDRS----- 90  
 ADDR----- 76  
 AGLE----- 123  
 KPDA----- 83  
 TPDQ----- 72  
 DGSN----- 69  
 KHK----- 71  
 ----- 29  
 ----- 29  
 GQRK----- 150  
 .....160.....170.....180.....190.....200.....210.....220.....230.....240.....250.....260.....270.....280.....290.....300

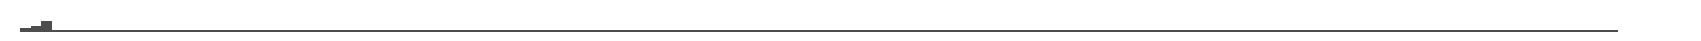

*Neospora caninum* SBE1  
*Toxoplasma gondii* SBE1  
*Besnoitia besnoiti* SBE1  
*Eimeria tenella* SBE1  
*Vitrella brassicaformis* GlgB  
*Cryptosporidium parvum* SBE1  
*Gregarina niphandrodes* SBE1  
*Paludisphaera borealis* GlgB  
*Aquisphaera giovannonii* GlgB  
*Isoosphaera pallida* GlgB  
*Thiohalomonas denitrificans* GlgB  
*Solemya velesiana* GlgB  
*Nitrosomonas communis* GlgB  
*Candidatus Thiomargarita*  
*Homo sapiens* GBEL  
*Mus musculus* GBEL  
*Arabidopsis thaliana* SBE2

DSPVAFKVDLLCVYEGDETNEERVADDTYFQVLLPRFDLELFQSSGCSWHDVNLGSHHILTVEGIRGVRFVAVWAPSACFVSVVGDWNGWDGRAHPMRRRIEFGVWELFVDPDIG-AGEKYGYRIHTR-GGLDIIKIDPVAQEFEPKPTAS 294  
 DSPVTFKYELLCVYEGDETNEERVAHDYFQVLLPRFDLELFQSSGCSWHDVNLGSHMLTVEGIRGVRFVAVWAPSACFVSVVGDWNAWDGRAHPMRRRVEFGVWELFVDPDIG-AGEKYGYRIHTR-GGLDVIKIDPVAQEFEPKPTAS 295  
 APPVTFKYEMLCIYEGDETQRERVIQDTYFQVLLPRFDLELFQSSGCSWHDVNLGSHIMTVDGQGVRFVAVWAPSACFVSVVGDWNGWDGRVHPMRRRIEFGVWELFVDPDIG-AGEKYGYRIHTR-GGTDIIKIDPVAQEFEPKPTAS 299  
 DPYVPLDYELLVREGGEETP--RVVYDYSFGMTVPQNLLELFQSSGCSWHDVNLGSHIITVDGVTGVRFVAVWAPNCICVSVVGDWNGWDGRAHPMRRRVEFGVWELFVDPDIG-AGEKYGYRIHTR-NGTDFIKIDPVAQEFEPKPTAS 297  
 HDLPPFLVELIVREGDGSNTEPVKRDANFSGCLLPDFDLNLFQSSGCSWHDVCLLGGHVVEVDAAGVRFVAVWAPNAVFSVVDWNGWDGRAHPMRRRHHYGVWELFIADVA-PGMKYGYRIHTR-NGMDFVKIDPVAQEFENPPAYAS 283  
 CVRKLYVELLVEVNGDSDGKVAIRDYFSGLLLSNGDMELFQSSGCSWHDVNLGSHIIEVNGVGVRFVAVWAPNAQFLSVVGFNQWDGRAHPMRRRHHYGVWELFVDPDIPRVGHRVMYKIHTR-RGTDIMKIDPVAQEFENPPAHAS 418  
 LAVPVEVELRVKICGDASNQSILKEDANRFCSLGEDQLRFLQSSGCSWHDVNLGSHIFVEVGGVRFVAVWAPNAQFLSVVGFNQWDGRAHPMRRRHHYGVWELFVDPDIPRVGHRVMYKIHTR-RGTDIMKIDPVAQEFENPPAHAS 284  
 ---EAFVRLKIE--NHEGHSWELVDFVAFEPVLTDFDLHLLGEGTHLHNYERLGAHLRMHEGFRGVHFAVWAPNAQRVSVVGNFNHWDGRRHQLNRGAAGIWEIFIPDIT-AGEVYKFEIKSRHSDYLVQKSDPYGFAEFRPKTAS 233  
 ---AAPRVRFRIE--NFEGHSWEQVDFVQFQVPLTDFDLHLLGEGTHLHNYERLGAHLRMHEGFRGVHFAVWAPNAQRVSVVGNFNHWDGRRHQLNRGAAGIWEIFIPDIT-AGEVYKFEIKSRHSDYLVQKSDPYGFAEFRPKTAS 219  
 ---GRPRVIRAT--DAEGRSWSQVDFVQFGRVLTDFDLHLLGEGTHYKNEYKMGAHIMEHEGVGHFAVWAPNARRVSVVGDWNGWDGRRLPMMRCGPHGIWEIFVPGVLV-QGDLVKKFETQSGFHGYLVEKSDPYGFAEFRPKTAS 266  
 ---VPERVALVLT--DHHGRTRIRHDDYAFPPRLTDFDLHLLGEGTHYKNEYKMGAHIMEHEGVGHFAVWAPNARRVSVVGDWNGWDGRRLPMMRCGPHGIWEIFVPGVLV-QGDLVKKFELRDR-NGGTHLKTDPYGRFELRPSHAA 225  
 ---VPERVQIAWT--DNYGHSARVDFVCFPPQLDFDVLHLLGEGTHYKNEYKMGAHIMEHEGVGHFAVWAPNARRVSVVGDWNGWDGRRLPMMRCGPHGIWEIFVPGVLV-QGDLVKKFELRDR-NGGTHLKTDPYGRFELRPSHAA 214  
 ---LPQHYRFIWH--DYDNYEIHADDPYVLPQLGDFDLHLLFAEGKHWAYRFLGAHPHEVNVNRCGLFSVWAPGAERVSIVGDFNRWDGRRHMPMRVQGYGVWELFIPDVH-PGMLYKFEIRNKEYGTIHSKIDPYGQEFELRPRNAS 212  
 ---LPDRYRLIWR--DKEHRTIHTDPCFPAQLSDFDMLHLLFAEGKHWAYRFLGAHPHEVNVNRCGLFSVWAPGAERVSIVGDFNRWDGRRHMPMRVQGYGVWELFIPDVH-PGMLYKFEIRNKEYGTIHSKIDPYGQEFELRPRNAS 214  
 ---RLEIDPYLKPVAVDQRRYKQFQILKNIGENEGGIDKFSRGEYFVGHRCADGGLYCKEAWPAGVFLGDFGNWNPFSYPYK-KLDYKWEIYIPPKQKSVLPHGSKL---VVITSKSGEILYRISPAWKY 163  
 ---RLEIDPYLKPVAVDQRRYKQFQILKNIGENEGGIDKFSRGEYFVGHRCADGGLYCKEAWPAGVFLGDFGNWNPFSYPYK-KLDYKWEIYIPPKQKSVLPHGSKL---VVITSKSGEILYRISPAWKY 163  
 ---LPPPGDGKRIYDIDPMLNSRNHLDYRYQYRKLREIDKNEGGLEAFSRGEYFVGHRCADGGLYCKEAWPAGVFLGDFGNWNPFSYPYK-KLDYKWEIYIPPKQKSVLPHGSKL---VVITSKSGEILYRISPAWKY 290  
 .....310.....320.....330.....340.....350.....360.....370.....380.....390.....400.....410.....420.....430.....440.....450

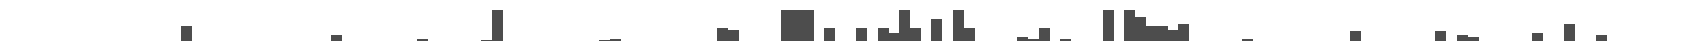

Neospora\_caninum\_SBE1 IISACDDAFRKP... 441  
Toxoplasma\_gondii\_SBE1 IISACDDAFRKP... 442  
Besnoitia\_besnoiti\_SBE1 IISACDDAFRKP... 446  
Eimeria\_tenella\_SBE1 IISACDDAFRKP... 444  
Vitrella\_brassicaformis\_GlgB IVSGCDDAYR... 430  
Cryptosporidium\_parvum\_SBE1 IISACDDAYR... 565  
Gregarina\_niphandrodes\_SBE1 VISGDDAYR... 429  
Paludisphaera\_borealis\_GlgB VVV-----... 370  
Aquisphaera\_giovannonii\_GlgB VVV-----... 356  
Isosphaera\_pallida\_GlgB VVV-----... 403  
Thiohalomonas\_denitrificans\_GlgB IVE-----... 360  
Solemya\_velesiana\_GlgB IIT-----... 349  
Nitrosomonas\_communis\_GlgB IIA-----... 347  
Candidatus\_Thiomargarita IVI-----... 349  
Homo\_sapiens\_GBE1 VVREGDN... 302  
Mus\_musculus\_GBE1 VVRENNN... 302  
Arabidopsis\_thaliana\_SBE2 SVQPPGE... 431

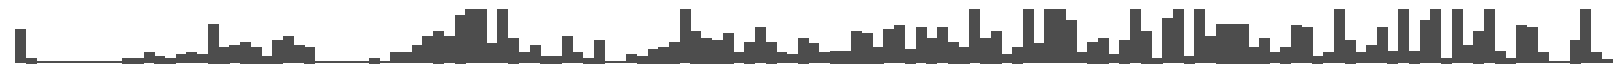

Neospora\_caninum\_SBE1 YDGEPCY... 571  
Toxoplasma\_gondii\_SBE1 YDGEPCY... 572  
Besnoitia\_besnoiti\_SBE1 YDGEPCY... 576  
Eimeria\_tenella\_SBE1 YDGEPCY... 592  
Vitrella\_brassicaformis\_GlgB YDGVPL... 560  
Cryptosporidium\_parvum\_SBE1 YDGTPT... 695  
Gregarina\_niphandrodes\_SBE1 FDGEP... 575  
Paludisphaera\_borealis\_GlgB FDGTH... 502  
Aquisphaera\_giovannonii\_GlgB FDGTH... 488  
Isosphaera\_pallida\_GlgB FDGTH... 535  
Thiohalomonas\_denitrificans\_GlgB FDGTP... 492  
Solemya\_velesiana\_GlgB FDGTAL... 481  
Nitrosomonas\_communis\_GlgB FDGTP... 477  
Candidatus\_Thiomargarita FDGTP... 479  
Homo\_sapiens\_GBE1 FDGTD... 436  
Mus\_musculus\_GBE1 FDGTD... 436  
Arabidopsis\_thaliana\_SBE2 FDGTD... 565

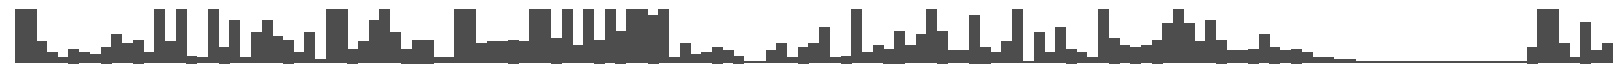

Neospora\_caninum\_SBE1 LGWMD... 698  
Toxoplasma\_gondii\_SBE1 LGWMD... 699  
Besnoitia\_besnoiti\_SBE1 LGWMD... 703  
Eimeria\_tenella\_SBE1 LGWMD... 717  
Vitrella\_brassicaformis\_GlgB LGWMD... 679  
Cryptosporidium\_parvum\_SBE1 LGWMD... 820  
Gregarina\_niphandrodes\_SBE1 LGWMD... 682  
Paludisphaera\_borealis\_GlgB MGWMD... 624  
Aquisphaera\_giovannonii\_GlgB MGWMD... 610  
Isosphaera\_pallida\_GlgB MGWMD... 657  
Thiohalomonas\_denitrificans\_GlgB MGWMD... 614  
Solemya\_velesiana\_GlgB MGWMD... 603  
Nitrosomonas\_communis\_GlgB MGWMD... 599  
Candidatus\_Thiomargarita MGWMD... 601  
Homo\_sapiens\_GBE1 MAIPDK... 574  
Mus\_musculus\_GBE1 MAIPDK... 574  
Arabidopsis\_thaliana\_SBE2 MAIAD... 713

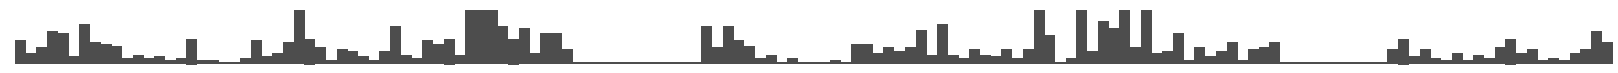

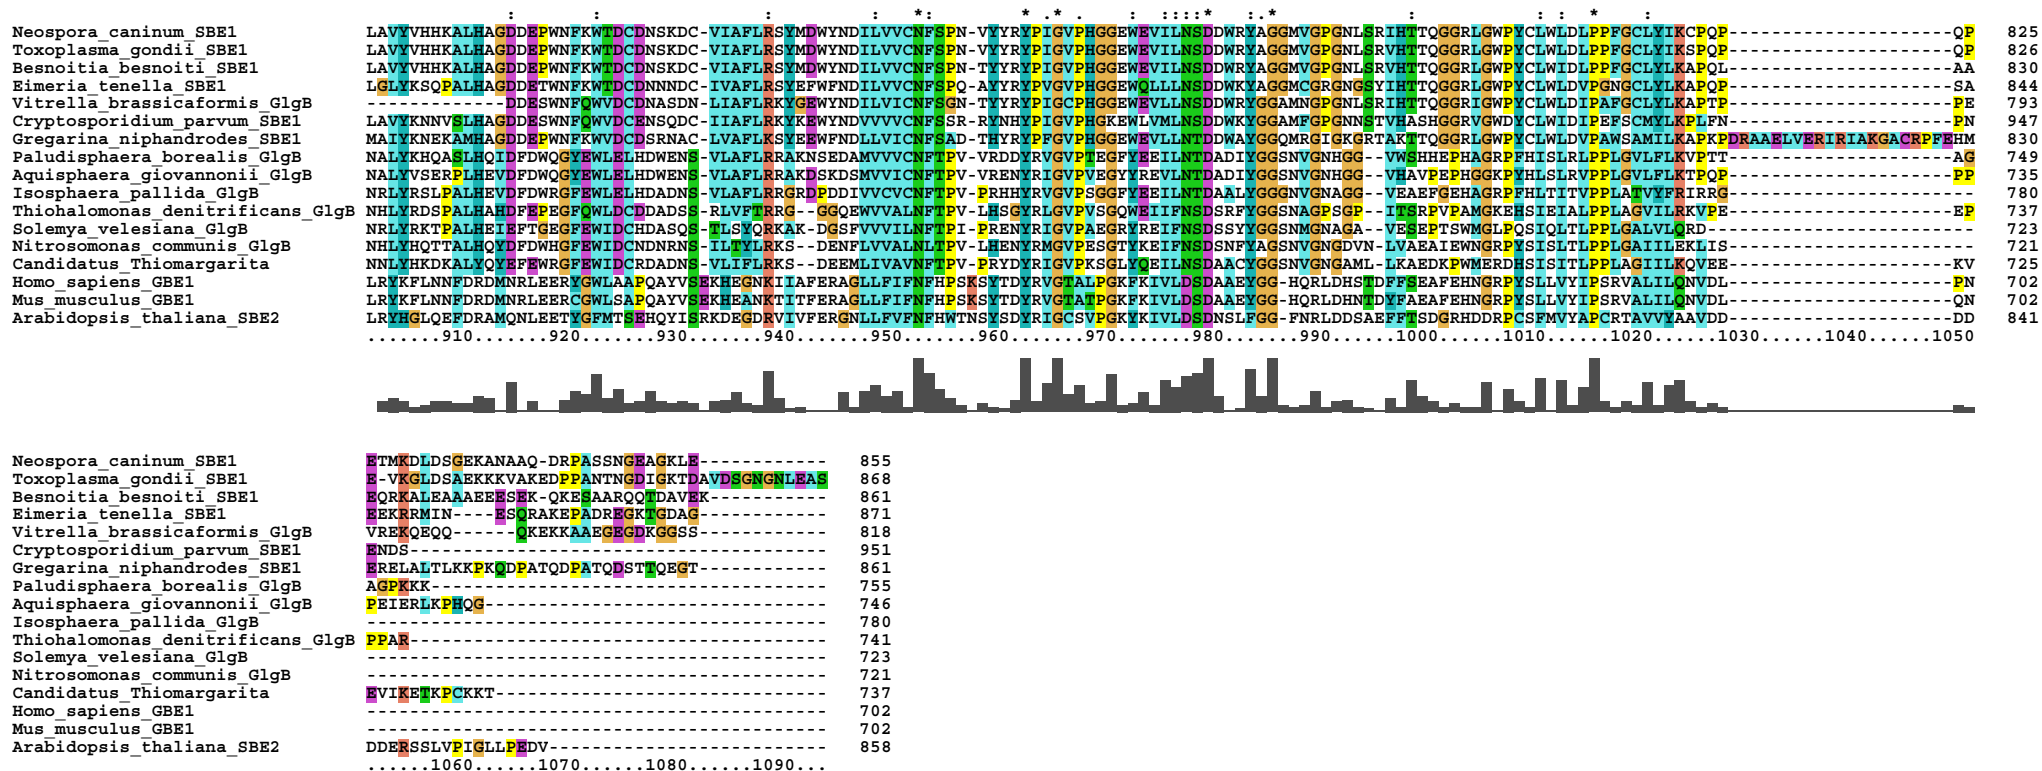

Fig. S1. Alignment of amino acid sequence and phylogenetic relationships analysis of starch branching enzyme in *T. gondii* and selected species.

A

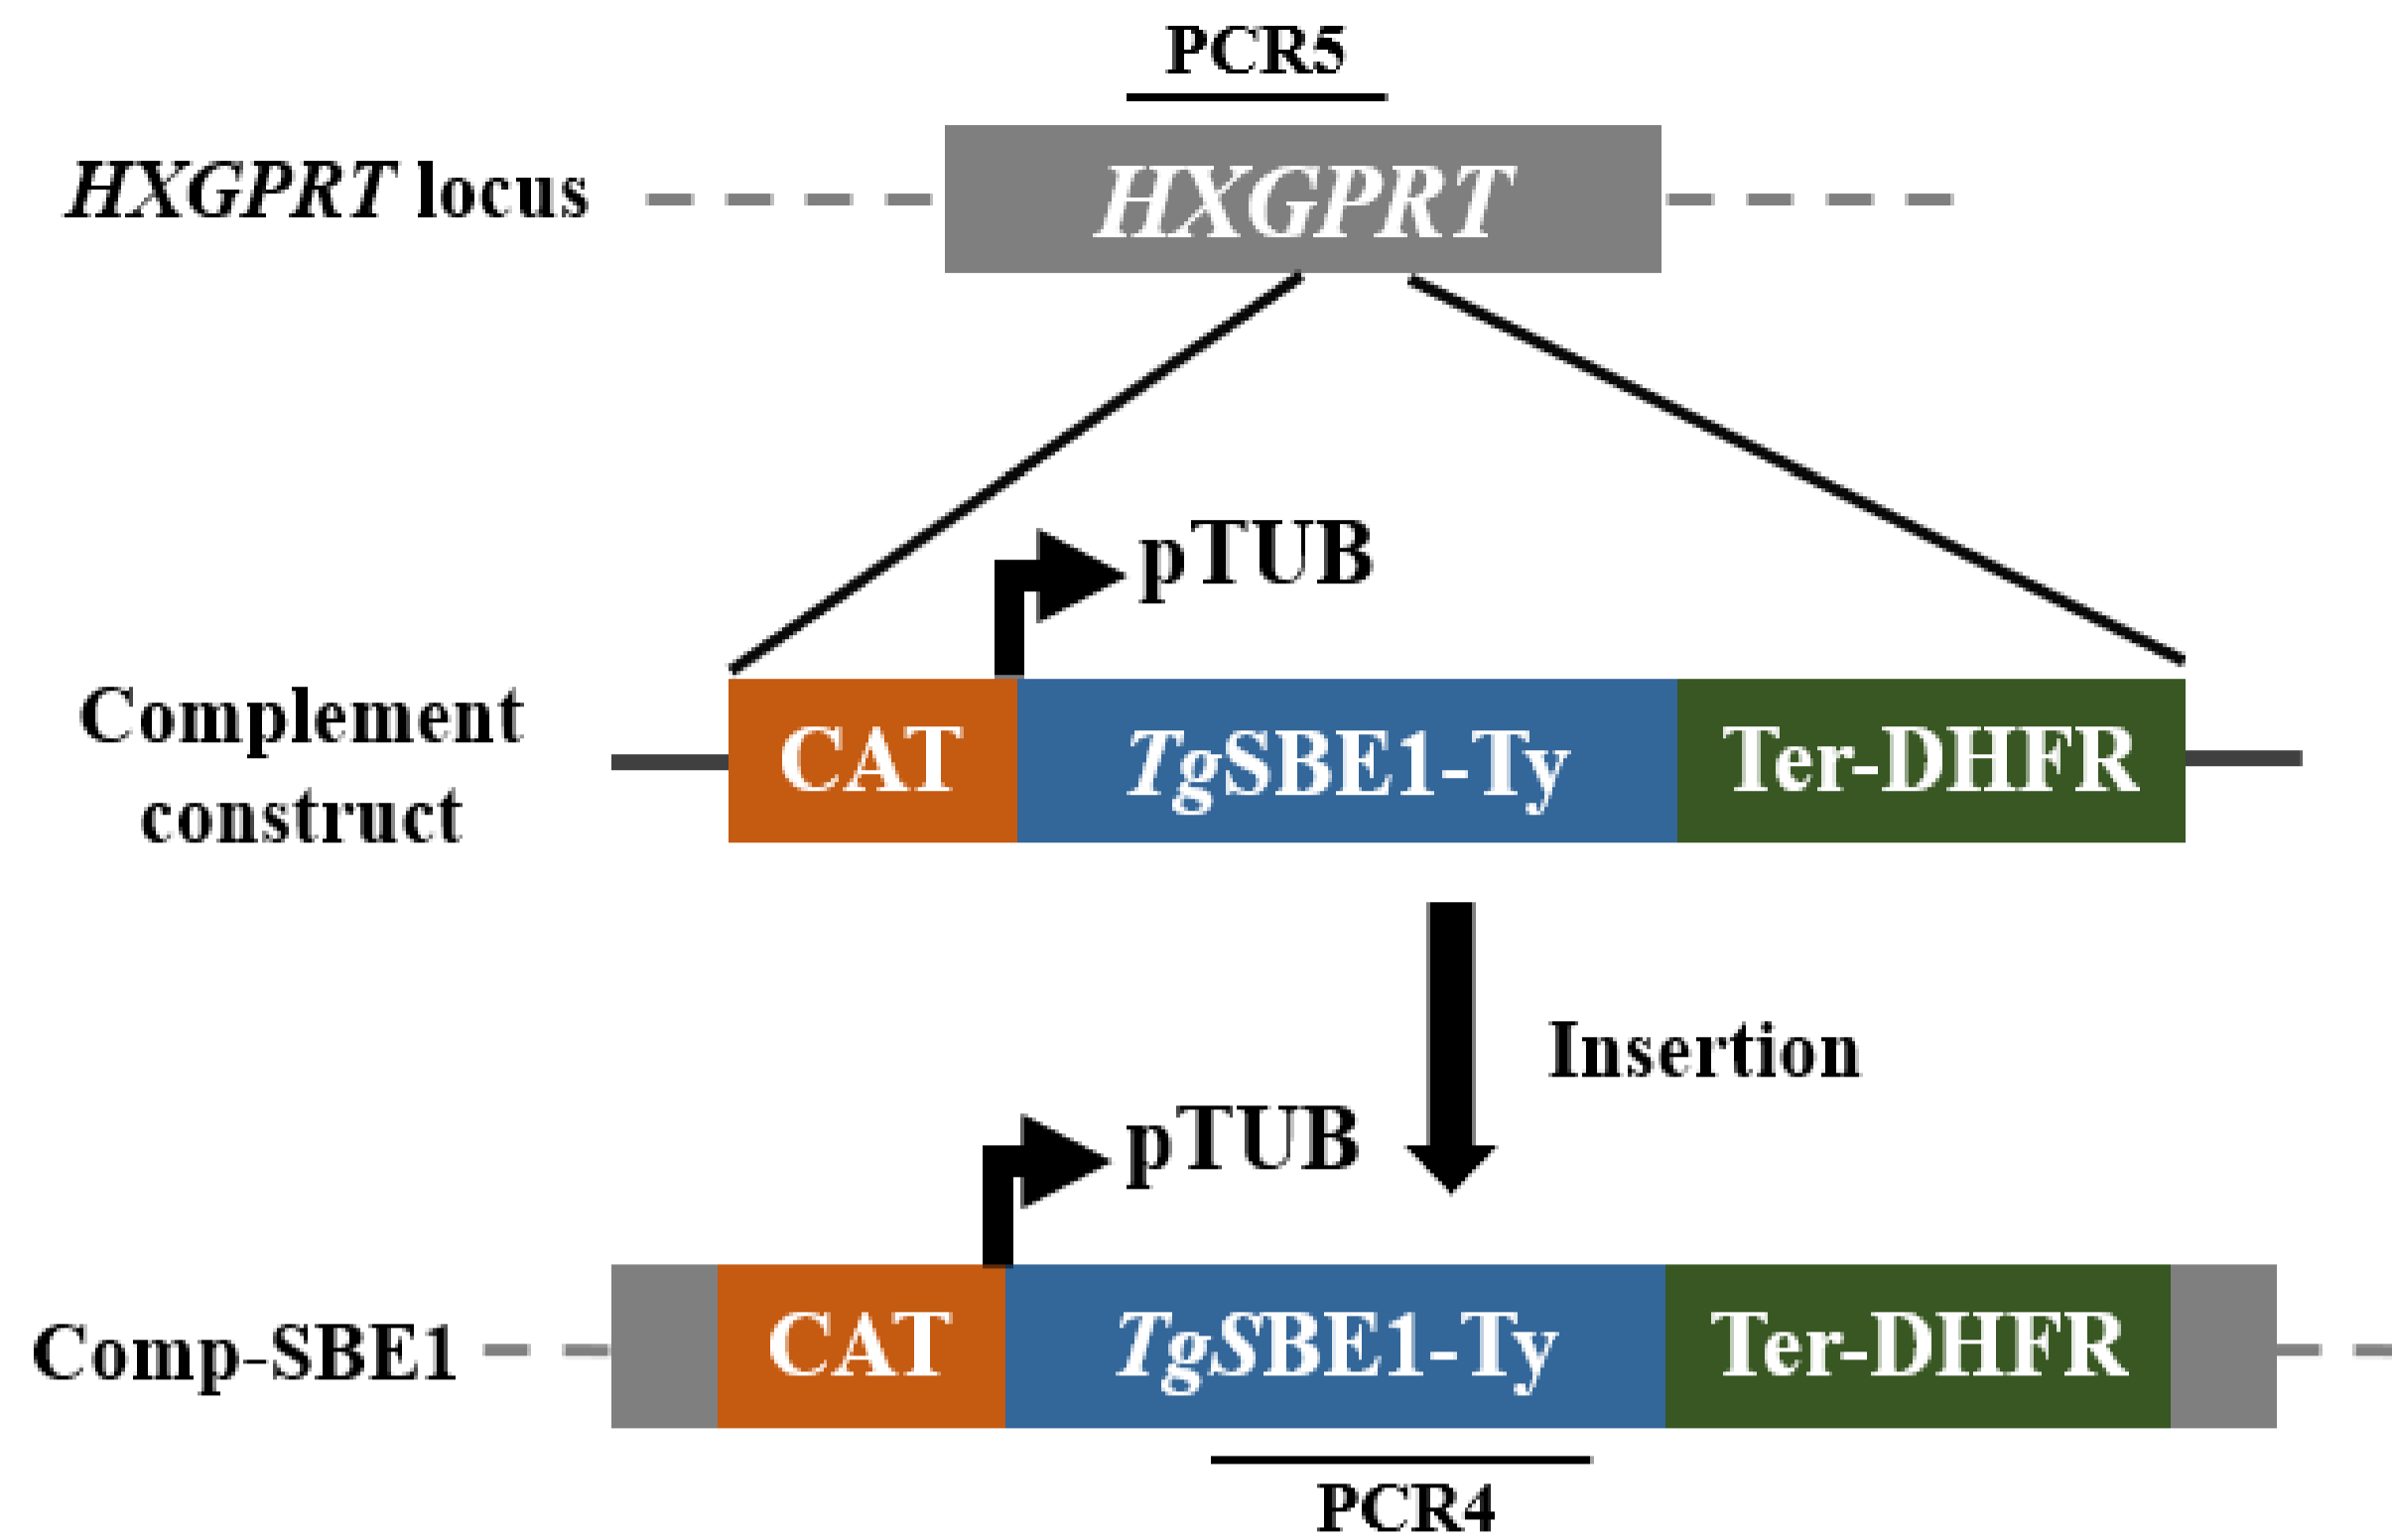

B

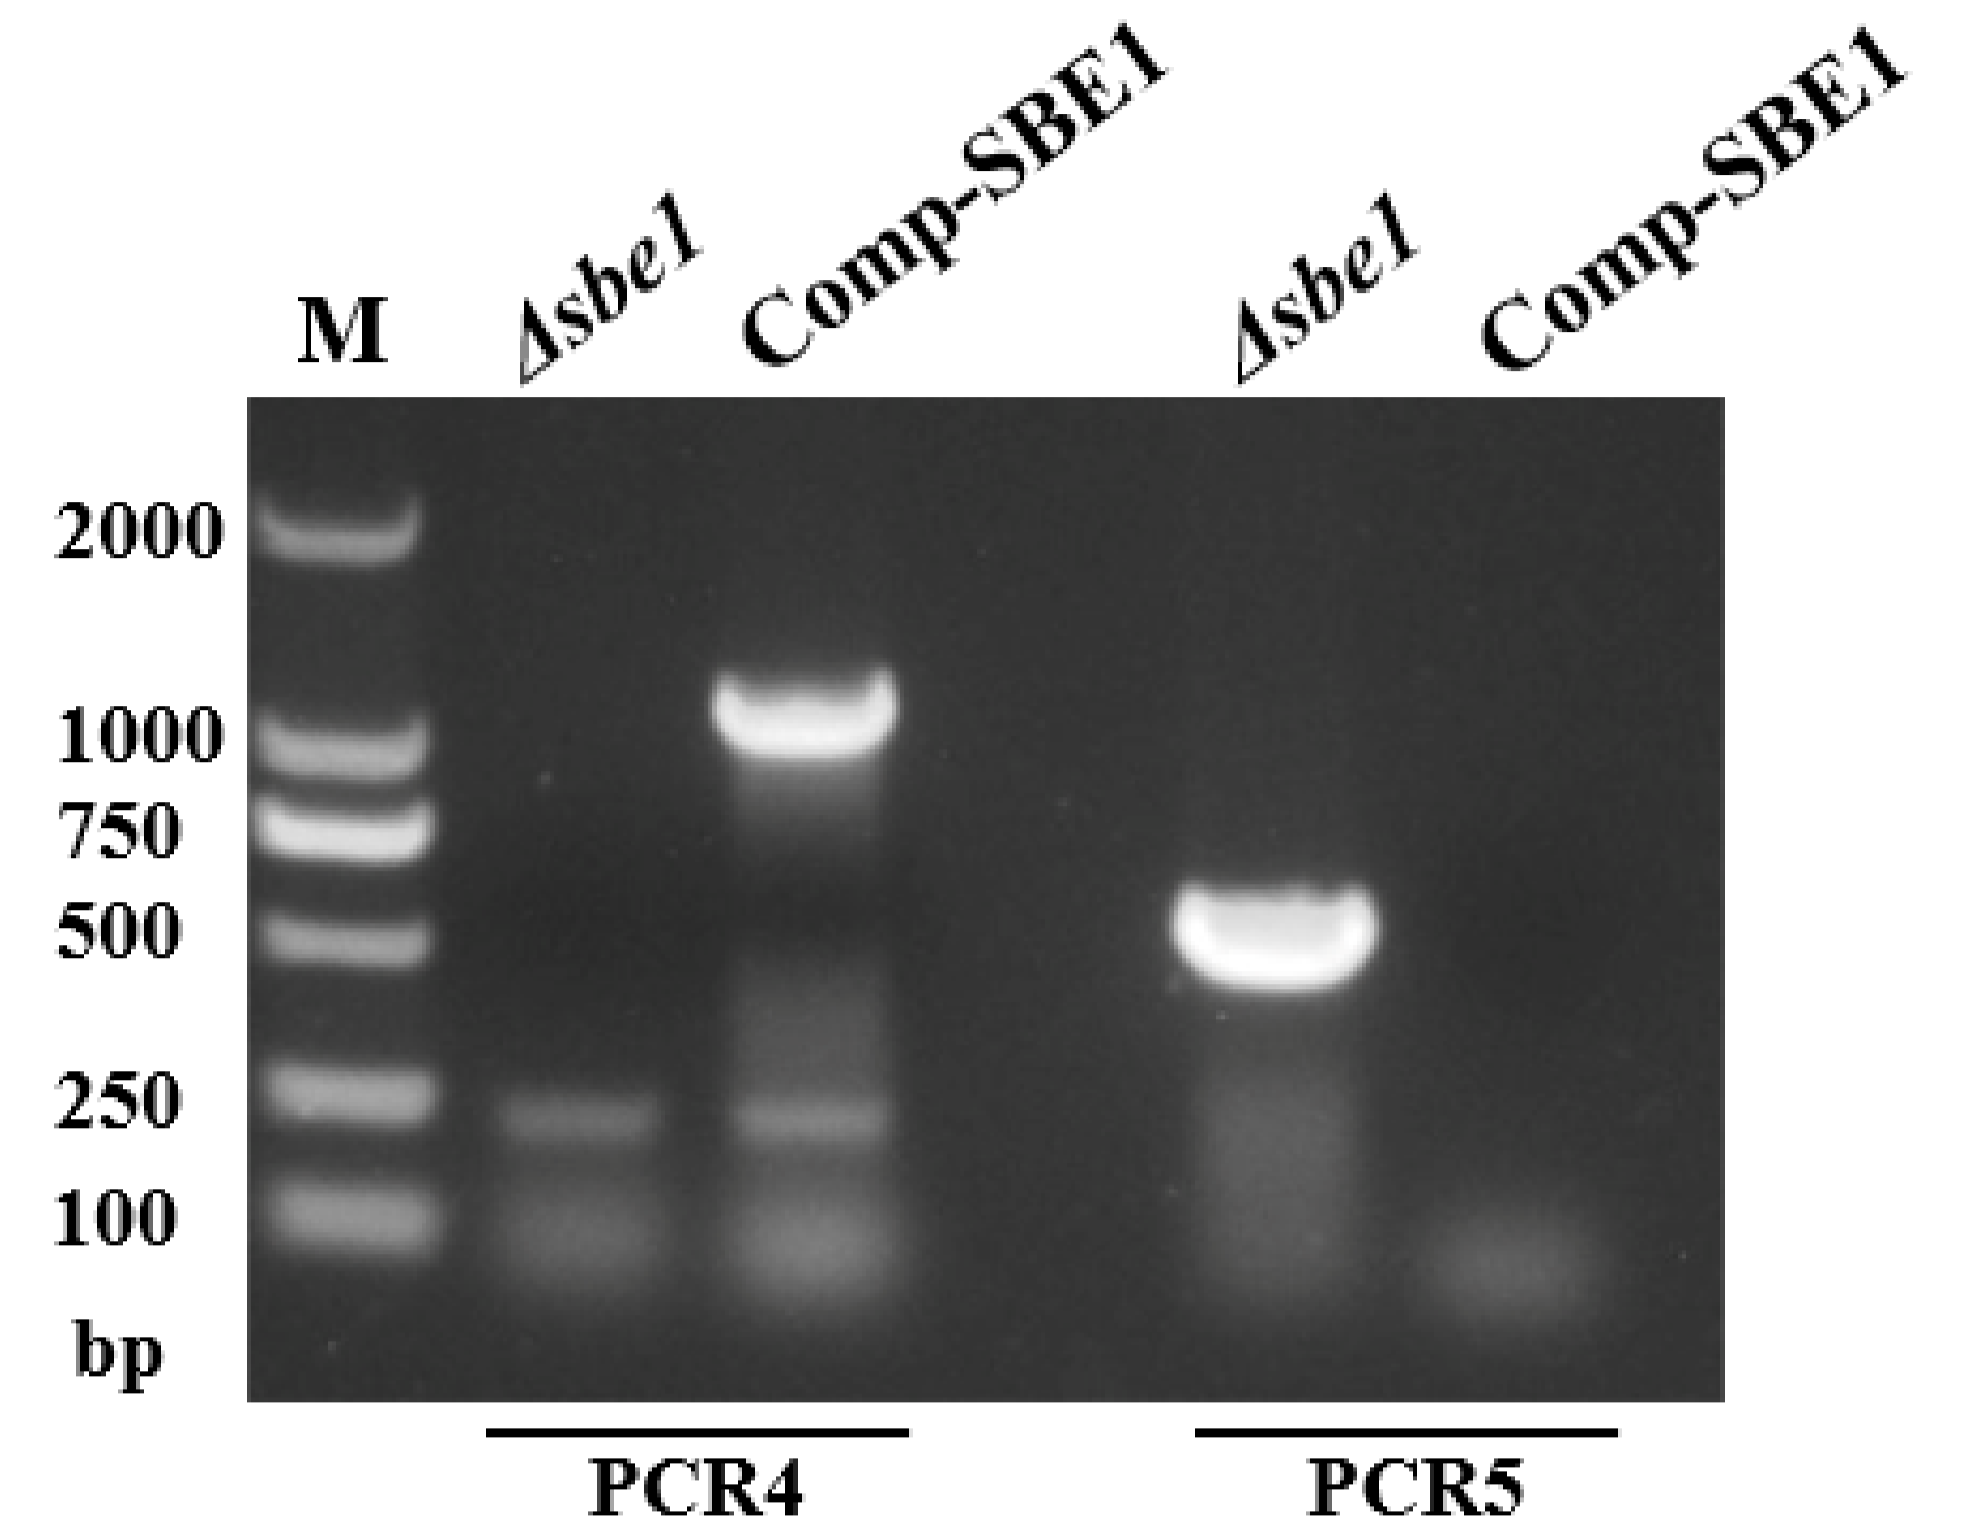

C

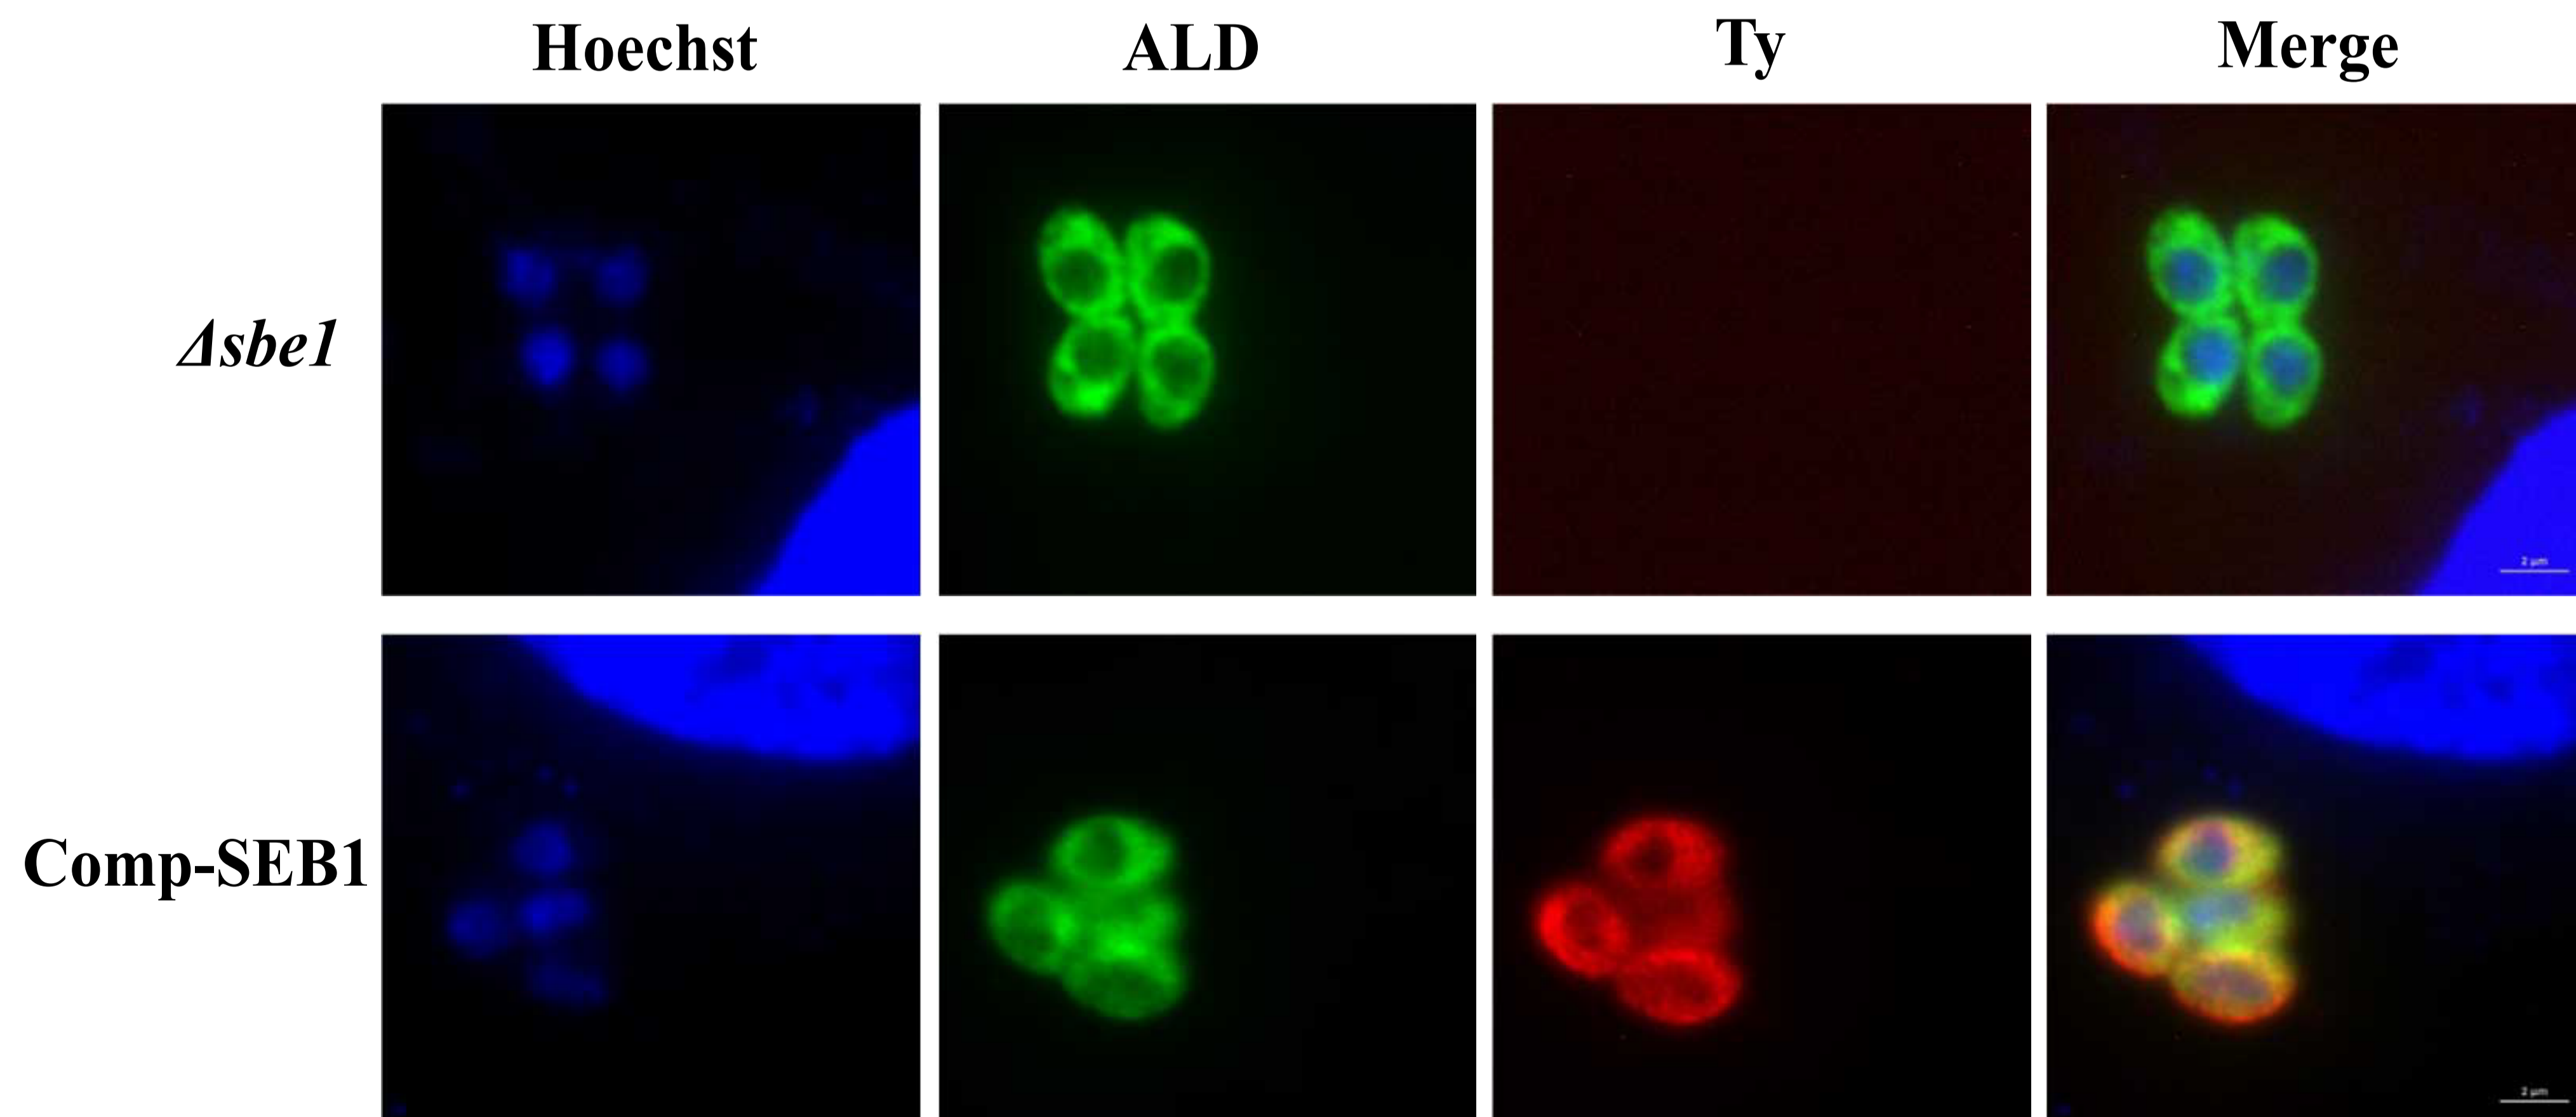

Fig. S2. Construction of SBE1 complementation strains.

A. Schematic illustration of generation of the Comp-SBE1 strain via CRISPR/CAS9-mediated technique.

B. Diagnostic PCRs on a Comp-SBE1 clone. C. The presence of SBE1 was confirmed by IFA. Samples were stained with mouse anti-Ty and rabbit anti-*T. gondii* ALD.

**Table S1: Primers used in this study.**

| Primer                | Sequence (5'-3')                                        | Used for                                        |
|-----------------------|---------------------------------------------------------|-------------------------------------------------|
| gRNA- <i>SBE1</i> -Fw | GGGTCTGCATATTCATAGCAGTTTTAGAGCTAGAAAT<br>AGC TAGAAATAGC | Construction of gRNA<br>plasmid for <i>SBE1</i> |
| gRNA-Rv               | AACTTGACATCCCCATTTAC                                    | knockout                                        |
| pUC19-Fw              | GGCGTAATCATGGTCATAGC                                    | Amplification of pUC19                          |
| pUC19-Rv              | ACTGGCCGTCGTTTTACAAC                                    | vector                                          |
| loxp-DHFR*-loxp-Fw    | CAACCCGCGCAGAAGACATC                                    | Amplification of loxp-                          |
| loxp-DHFR*-loxp-Rv    | GGACACGCTGAACTTGTGGC                                    | DHFR*-loxp fragment                             |
| U5- <i>SBE1</i> -Fw   | GTTGTAAAACGACGGCCAGTCTCTCATGCACTCAAC<br>ATC             | Amplification of the 5'<br>homologous arm of    |
| U5- <i>SBE1</i> -Rv   | GATGTCTTCTGCGCGGGTTGCTTCTCCTGACTGAGG<br>TGAC            | <i>SBE1</i>                                     |
| U3- <i>SBE1</i> -Fw   | GCCACAAGTTCAGCGTGTCCGTGAAGGCGCGTGAA<br>AACCC            | Amplification of the 3'<br>homologous arm of    |
| U3- <i>SBE1</i> -Rv   | GCTATGACCATGATTACGCCCGTACTCCTCCATCTTG<br>GC             | <i>SBE1</i>                                     |
| 5'-UpU5- <i>SBE1</i>  | GGTAGCCCGATATTCACATGCAG                                 | Verification of                                 |
| 3'-In DHFR*           | GATTTGTGAGGACGACTCAC                                    | <i>SBE1</i> deletion by PCR1                    |
| 5'-In DHFR*           | CACGACAGCAGACAACCTTC                                    | Verification of <i>SBE1</i>                     |
| 3'-DnU3- <i>SBE1</i>  | GTGCCGTGCGAAAAACACGGAAC                                 | deletion by PCR2                                |
| In- <i>SBE1</i> -Fw   | GTCACAGGTTTATACGCGCC                                    | Verification of <i>SBE1</i>                     |

---

|                           |                                                 |                                                               |
|---------------------------|-------------------------------------------------|---------------------------------------------------------------|
| In- <i>SBE1</i> -Rv       | GCTCTTGGAGGAGAGACATG                            | deletion by PCR3                                              |
| Vec-Fw                    | GAGGTCCACACGAACCAGGAC                           | Amplification of the                                          |
| Vec-Rv                    | CTTGCTCACCATTTTAGATC                            | complementation vector                                        |
| <i>SBE1</i> -CDS-Fw       | GATCTAAAATGGTGAGCAAGATGGGAGATCTTCGAG<br>CATC    | Amplification of <i>SBE1</i>                                  |
| <i>SBE1</i> -CDS-Rv       | GTCCTGGTTCGTGTGGACCTCCTCCTGGCGCTCGTA<br>AACAG   | CDS                                                           |
| gRNA- <i>HXGPRT</i> -Fw   | GCAGAACTTACTTCGGCGAGGGTTTTAGAGCTAGAA<br>ATAGC   | Construction of gRNA<br>plasmid for <i>HXGPRT</i><br>knockout |
| PCR4- <i>SBE1</i> -Fw     | GTGGACATGGCCGCTGCATG                            | Verification of <i>SBE1</i>                                   |
| PCR4- <i>SBE1</i> -Rv     | GTTGTTGTCGCCACGCATCCAG                          | complementation by<br>PCR4                                    |
| In- <i>HXGPRT</i> -Fw     | CAAGGGCCGTATTGAGCCCATG                          | Verification of <i>HXGPRT</i>                                 |
| In- <i>HXGPRT</i> -Rv     | CACACGCCTTCCAAATGTCGCG                          | deletion by PCR5                                              |
| CAT-Fw                    | CGTGTTTACTCGGATACTGACGAGGTCGACGGTATC<br>GATAAGC | Amplification of CAT                                          |
| CAT-Rv                    | CCCTGCCACTGTTTATTCGCGCTCTAGAACTAGTGGA<br>TCG    | fragment                                                      |
| p- <i>SBE1</i> -CAT-U5-Fw | GATGCTACACATTTCTCACC                            | Amplification of the 5'                                       |
| p- <i>SBE1</i> -CAT-U5-Rv | GTCAGTATCCGAGTAAACACG                           | homologous arm of<br><i>SBE1</i> based on CAT tag             |

---

---

|                           |                      |                                                   |
|---------------------------|----------------------|---------------------------------------------------|
| p- <i>SBE1</i> -CAT-U3-Fw | CGAATAAACAGTGGCAGGG  | Amplification of the 3'                           |
| p- <i>SBE1</i> -CAT-U3-Rv | AGTTGCTAGCTCTACTTCGC | homologous arm of<br><i>SBE1</i> based on CAT tag |
| 3'-In CAT                 | GCACTGTGAGCACTGATAGG | Verification of <i>SBE1</i><br>deletion by PCR1   |
| 5'-In CAT                 | GGAGTGTTTCGCAGCAAGC  | Verification of <i>SBE1</i><br>deletion by PCR2   |

---
